# Supplementary material
Source: PubMed Central journal article supplement (PMC3444265)
Supplement: supp_ers200_00080598_file001.pdf [file supp_ers200_00080598_file001.pdf]

# **A somaclonal line *SE7* of finger millet (*Eleusine coracana*) exhibits modified cytokinin homeostasis and increased grain yield**

Volodymyr Radchuk<sup>1,\*</sup>, Ruslana Radchuk<sup>1</sup>, Yaroslav Pirko<sup>1,2</sup>, Radomira Vankova<sup>3</sup>, Alena Gaudinova<sup>3</sup>, Vitaly Korkhovoy<sup>1,2</sup>, Alla Yemets<sup>2</sup>, Hans Weber<sup>1</sup>, Winfriede Weschke<sup>1</sup>, Yaroslav B. Blume<sup>2</sup>

<sup>1</sup>Leibniz Institute of Plant Genetics and Crop Plant Research (IPK), Corrensstrasse 3, 06466 Gatersleben, Germany;

<sup>2</sup>Institute of Food Biotechnology and Genomics, National Academy of Science of Ukraine, Osipovskogo Str. 2a, 04123 Kiev, Ukraine;

<sup>3</sup>Laboratory of Hormonal Regulations in Plants, Institute of Experimental Botany, Academy of Sciences of the Czech Republic, Rozvojová 263, 16502 Prague 6, Czech Republic

# Stage B

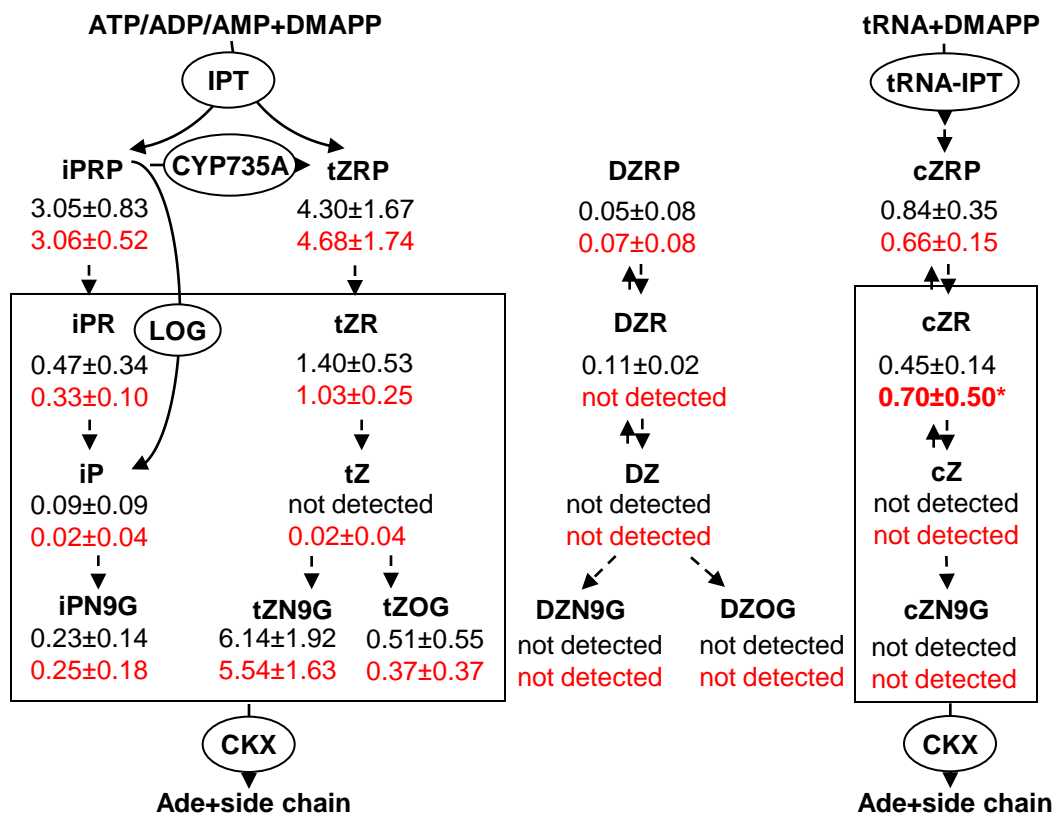

**Supplementary Figure S1.** Levels of cytokinins measured in young inflorescences of *SE-7* mutant and wild type of finger millet at the stage of flower development (stage B). Wild type cytokinin contents are depicted in black; those of the *SE-7* mutant in red. Data represent mean values (in pmol/g fresh weight) ± SD. Statistically significant values are written in bold (\* $P < 0.05$ ; calculated by Student's *t*-test). Key enzymes involved in cytokinin biosynthesis and degradation are shown in cycles. Cytokinin derivatives shown in a box are potential targets for CKX enzyme (Frébert et al., 2011). Abbreviations: CKX, cytokinin oxidase/dehydrogenase; cZ, cis-zeatin; cZNG, cis-zeatin 9-glucoside; cZR, cis-zeatin riboside; cZRP, cis-zeatin ribotide-phosphate; DZ, dihydro-zeatin; DZNG, dihydro-zeatin 9-glucoside; DZOG, dihydro-zeatin O-glucoside; DZR, dihydro-zeatin riboside; DZRP, dihydro-zeatin ribotidephosphate; iP, *N*6-( $\Delta^2$ -isopentenyl) adenine; iPR, iP riboside; iPNG, iP 9-glucoside; iPRP, iP ribotidephosphate; IPT, adenosine phosphate-isopentenyltransferase; LOG, LONELY GUY; tRNA-IPT, tRNA-isopentenyltransferase; tZ, trans-zeatin; tZNG, trans-zeatin 9-glucoside; tZOG, trans-zeatin O-glucoside; tZR; trans-zeatin riboside; tZRP, trans-zeatin ribotide-phosphate.

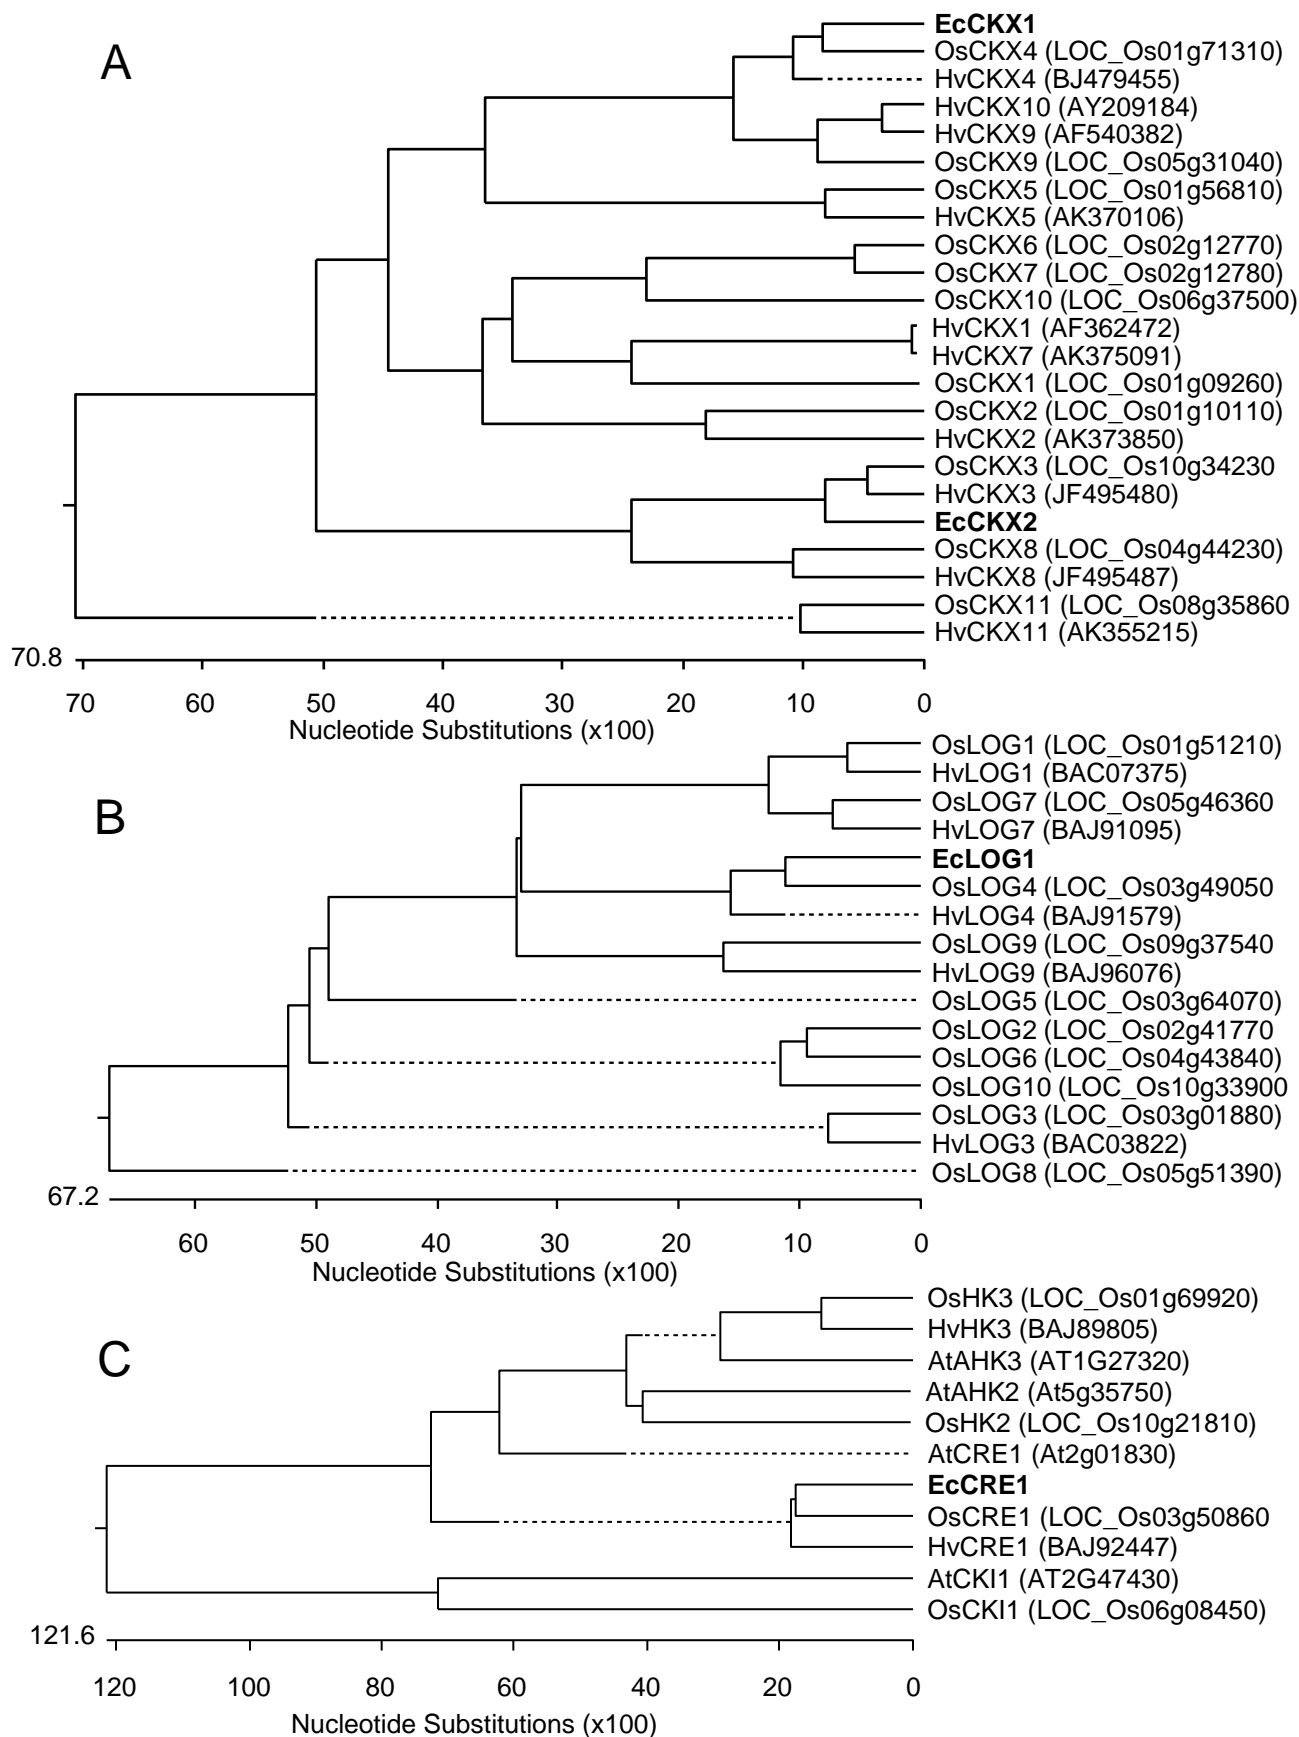

**Supplementary Table S1.** Primers used in cloning experiments and for qRT-PCR analyses.

| Gene and<br>Primer Name                  | PCR<br>Product<br>Size, nt | Sequence                                                           |
|------------------------------------------|----------------------------|--------------------------------------------------------------------|
| <b>Primers used for gene cloning</b>     |                            |                                                                    |
| <b>EcCKX1</b>                            |                            |                                                                    |
| EcCKX1dir                                | 1391                       | 5'-TGCGCCTCGACGGCCATTTTCAG-3'                                      |
| EcCKX1rev                                |                            | 5'-GGATCGTACGATTGCCCCTTCC-3'                                       |
| <b>EcCKX2</b>                            |                            |                                                                    |
| EcCKX2dir<br>polyT                       | 1758                       | 5'-CACCACCATCGCTGCGTCCAGT-3'<br>5'-GTTGGGTNTTTTTTTTTTTTTTTTTTTT-3' |
| <b>EcLOG1</b>                            |                            |                                                                    |
| EcLOG1dir<br>polyT                       | 957                        | 5'-CGACAAGGTTGTGGAGAGCGG-3'<br>the same as above                   |
| <b>EcCRE1</b>                            |                            |                                                                    |
| EcCRE1dir                                | 706                        | 5'-GTGGAAGTGGCATTGGATTGAGCAT-3'                                    |
| EcCRE1rev                                |                            | 5'-CTCCACCTTTGCCCATATTTCTTCA-3'                                    |
| <b>Primers used for qRT-PCR analyses</b> |                            |                                                                    |
| <b>EcCKX1</b>                            |                            |                                                                    |
| qCKX1-f2                                 | 72                         | 5'-GCGCCCTACACGACACAACAGC-3'                                       |
| qCKX1-r2                                 |                            | 5'-CGCCCTTCCGTTCAATGTCTCC-3'                                       |
| <b>EcCKX2</b>                            |                            |                                                                    |
| qCKX2-f2                                 | 51                         | 5'-GCTTCCTCTCCGGCTCATCTTT-3'                                       |
| qCKX2-r2                                 |                            | 5'-CTCCCCTGGCTGCCACTGTCAC-3'                                       |
| <b>EcLOG1</b>                            |                            |                                                                    |
| qLOG1-f1                                 | 144                        | 5'-GCTGCGCGGGACATTTTCGTA-3'                                        |
| qLOG1-r1                                 |                            | 5'-GGCAGCGGCGTCCTTATCTCC-3'                                        |
| <b>EcCRE1</b>                            |                            |                                                                    |
| qCRE1-f2                                 | 139                        | 5'-TGTTGCATTCTCTGCCATCCTG-3'                                       |
| qCRE1-r2                                 |                            | 5'-GCCAGTTCAGTGGAGCCAACAA-3'                                       |
| <b>actin</b>                             |                            |                                                                    |
| qactin_u                                 | 171                        | 5'-ATGGTGGGGATGGGGCAGAAG-3'                                        |
| qvactin_r                                |                            | 5'-CTCCTCCGGGGCAACACGAA-3'                                         |
